# Supplementary material
Source: HighWire-hosted journal article supplement (http://www.jrheum.org/highwire/filestream/31394/field_highwire_adjunct_files/0/161184DataSuppl.pdf)
Supplement: 161184DataSuppl.pdf [file 161184DataSuppl.pdf]

**Supplementary Table 1.** Baseline traditional cardiovascular risk factors and the association with disease activity.

|                            | DAS28 levels               |         | ESR levels                |         | CRP levels                 |         |
|----------------------------|----------------------------|---------|---------------------------|---------|----------------------------|---------|
|                            | B (CI)                     | p       | B (CI)                    | p       | B (CI)                     | P       |
| Age, years                 | 2.250<br>(1.412-3.089)     | < 0.001 | 0.152<br>(0.103-0.202)    | < 0.001 | 0.093<br>(0.042-0.145)     | < 0.001 |
| BMI, kg/m <sup>2</sup>     | 0.556<br>(0.231-0.880)     | 0.001   | 0.035<br>(0.016-0.054)    | < 0.001 | 0.013<br>(-0.008-0.034)    | 0.236   |
| Syst BP, mmHg <sup>†</sup> | 3.328<br>(1.834-4.821)     | < 0.001 | 0.172<br>(0.071-0.273)    | 0.001   | 0.167<br>(0.061-0.272)     | 0.002   |
| Dia BP, mmHg <sup>†</sup>  | 1.760<br>(0.893-2.627)     | < 0.001 | 0.087<br>(0.028-0.145)    | 0.004   | 0.084<br>(0.022-0.146)     | 0.008   |
| TChol, mmol/l‡             | -0.068<br>(-0.412-0.007)   | 0.076   | -0.004<br>(-0.009-0.000)  | 0.077   | -0.006<br>(-0.010- -0.001) | 0.012   |
| LDL, mmol/l‡               | -0.026<br>(-0.093-0.041)   | 0.450   | -0.001<br>(-0.005-0.003)  | 0.537   | -0.001<br>(-0.005-0.003)   | 0.592   |
| HDL, mmol/l‡               | -0.067<br>(-0.097- -0.038) | < 0.001 | -0.004<br>(-0.006--0.002) | < 0.001 | -0.005<br>(-0.007--0.003)  | < 0.001 |
| TChol:HDL ratio‡           | 0.161<br>(0.066-0.257)     | 0.001   | 0.009<br>(0.003-0.014)    | 0.004   | 0.011<br>(0.005-0.017)     | < 0.001 |
| Triglycerides, mmol/l‡     | 0.041<br>(-0.003-0.084)    | 0.067   | 0.001<br>(-0.001-0.004)   | 0.310   | < 0.001<br>(-0.002-0.003)  | 0.875   |
|                            | OR (CI)                    | p       | OR (CI)                   | p       | OR (CI)                    | p       |

Online supplement to: The Relationship Between Cardiac Conduction Times, Cardiovascular Risk Factors, and Inflammation in Patients with Early Arthritis. *The Journal of Rheumatology* (doi:10.3899/jrheum.161184).

|                             |                        |       |                        |       |                        |       |
|-----------------------------|------------------------|-------|------------------------|-------|------------------------|-------|
| Current smoking<br>(yes/no) | 1.101<br>(0.957-1.267) | 0.178 | 0.994<br>(0.985-1.003) | 0.179 | 1.003<br>(0.994-1.017) | 0.526 |
| Gender (male/<br>female)    | 1.183<br>(1.021-1.370) | 0.025 | 1.005<br>(0.996-1.014) | 0.259 | 0.990<br>(0.982-0.998) | 0.020 |

ABI: ankle brachial index, B: beta, BMI: body mass index, CI: confidence interval, CRP: C-reactive protein, DAS: disease activity score, dia BP: diastolic blood pressure, ESR: erythrocyte sedimentation rate, HDL: high-density lipoprotein, HR: heart rate, LDL: low-density lipoprotein, mmol/l: millimole/liter, ms: milliseconds, OR: odds ratio, syst BP: systolic blood pressure, TChol: total cholesterol

† Patients who did not use antihypertensive drugs, n=360

‡ Patients who did not use statins, n=417.

**Supplementary Table 2.** Patients with one year follow-up data and traditional cardiovascular risk factors, n=243.

| Cardiovascular risk factors           | T=0           | T=1           | p       |
|---------------------------------------|---------------|---------------|---------|
| BMI, kg/ m <sup>2</sup> (mean, SD)    | 26.6 (4.8)    | 26.8 (5.1)    | 0.037   |
| Syst BP, mmHg (mean, SD) †            | 133.4 ( 19.1) | 131.6 (15.9)  | 0.212   |
| Dia BP, mmHg (mean, SD) †             | 79.5 (10.8)   | 77.6 (11.3)   | 0.045   |
| ABI (mean, SD) †                      | 1.0 (0.1)     | 1.0 (0.1)     | 0.228   |
| TChol, mmol/l (mean, SD) ‡            | 5.3 (1.0)     | 5.4 (1.0)     | 0.043   |
| Triglycerides, mmol/l (median, IQR) ‡ | 1.1 (0.8-1.5) | 1.1 (0.9-1.5) | 0.692   |
| LDL cholesterol, mmol/l (mean, SD) ‡  | 3.3 (0.9)     | 3.2 (0.9)     | 0.076   |
| HDL cholesterol, mmol/l (mean, SD) ‡  | 1.4 (0.4)     | 1.6 (0.5)     | < 0.001 |
| TChol:HDL ratio, (mean, SD) ‡         | 4.1 (1.2)     | 3.6 (1.1)     | < 0.001 |

ABI: ankle brachial index, BMI: body mass index, dia BP: diastolic blood pressure, mg/l :milligrams/liter, HDL: high-density lipoprotein, HR: heart rate, IQR: interquartile range, kg/m<sup>2</sup>: kilogram square meter, LDL: low-density lipoprotein, mmHg: millimetre mercury, mmol/l: millimole/ liter, SD: standard deviation, syst BP: systolic blood pressure, TChol: total cholesterol

† Patients who did not use antihypertensive drugs, n=188

‡ Patients who did not use statins, n=204.
